# Supplementary material for: An alternating polymer with fluorinated quinoxaline and 2,7-carbazole segments for photovoltaic devices
Source: Royal Society of Chemistry journal article supplement (doi:10.1039/c6ra28128a), 2017-01-01
Supplement: c6ra28128a1.pdf [file c6ra28128a1.pdf]

## Supporting Information

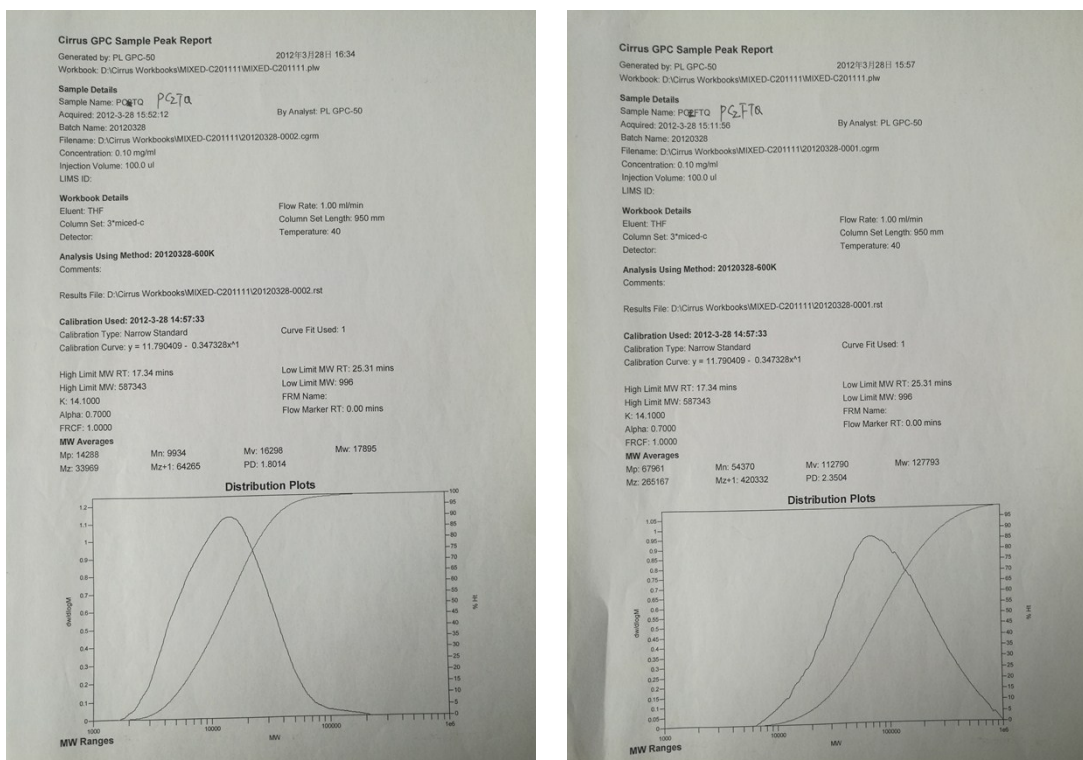

Fig. S1. GPC curves

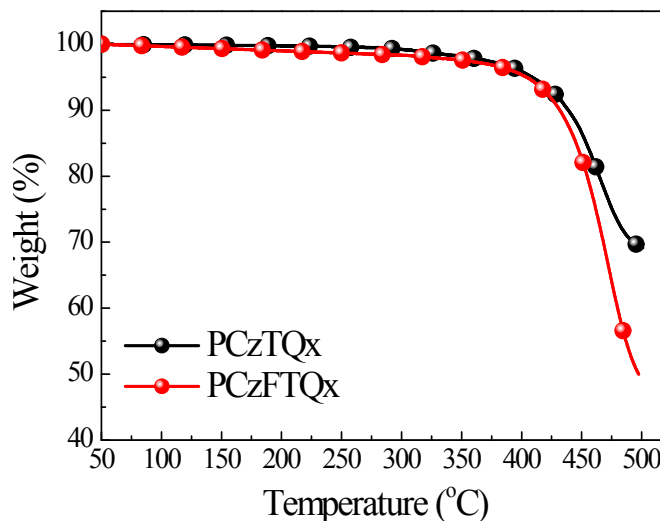

Fig. S2. Thermal gravimetric analysis curves of the polymers with a heating rate of 10 °C/min in nitrogen.

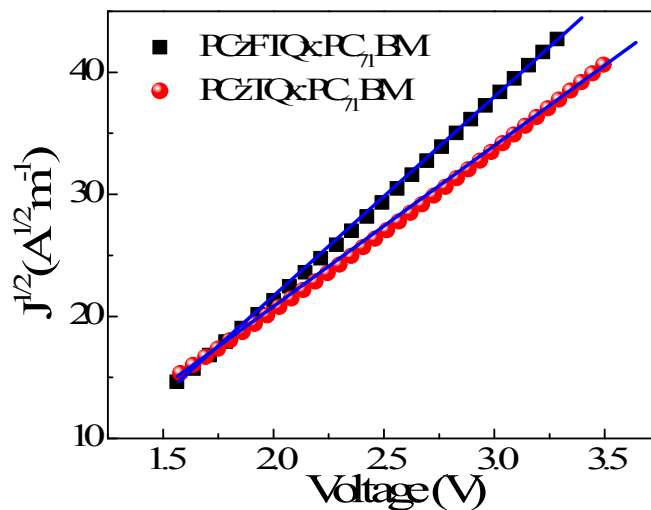

Fig. S3.  $J^{1/2} \sim V$  characteristics of PCzTQx and PCzFTQx hole-only devices measured at ambient temperature.

Table S1. The SCLC mobilities of PCzTQx and PCzFTQx blend films.

| Active layers                | Thickness (nm) | Hole mobility ( $\text{cm}^2 \text{V}^{-1} \text{s}^{-1}$ ) |
|------------------------------|----------------|-------------------------------------------------------------|
| PCzTQx :PC <sub>71</sub> BM  | 81             | $3.12 \times 10^{-5}$                                       |
| PCzFTQx :PC <sub>71</sub> BM | 87             | $6.18 \times 10^{-5}$                                       |
